# Supplementary material
Source: ML conference proceedings conference paper supplement (https://openreview.net/forum?id=2alTAhy3_RW)

# Dawid-Skene Estimates

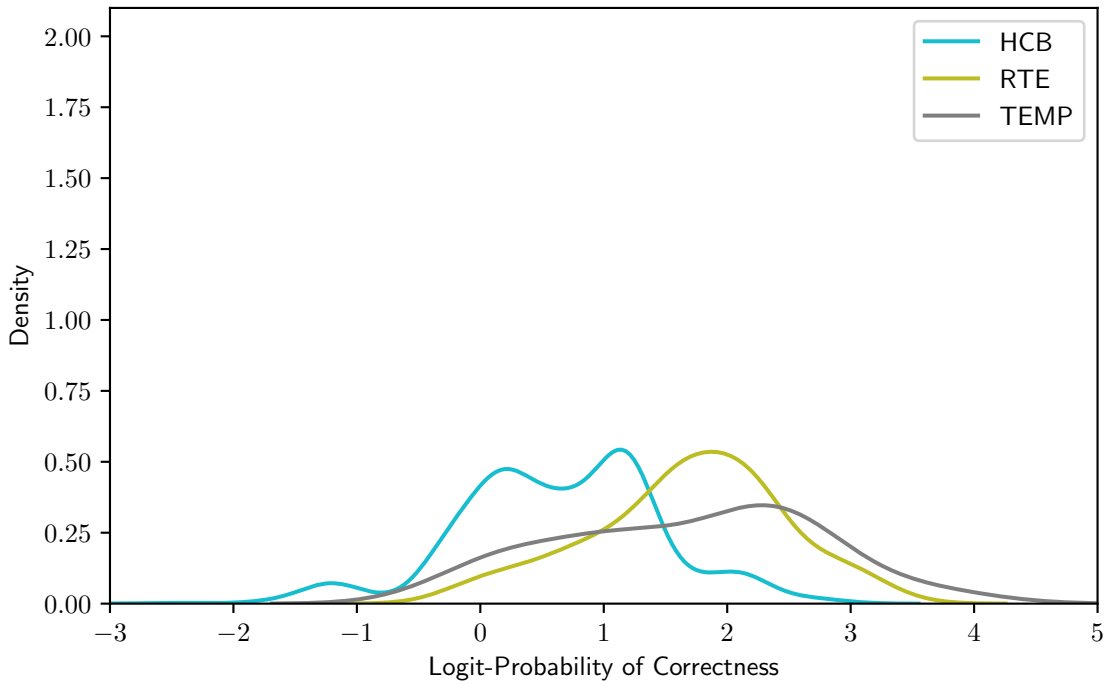

Supplement: supplementary_material [file attachment]

Category-dependent 1PL Estimates

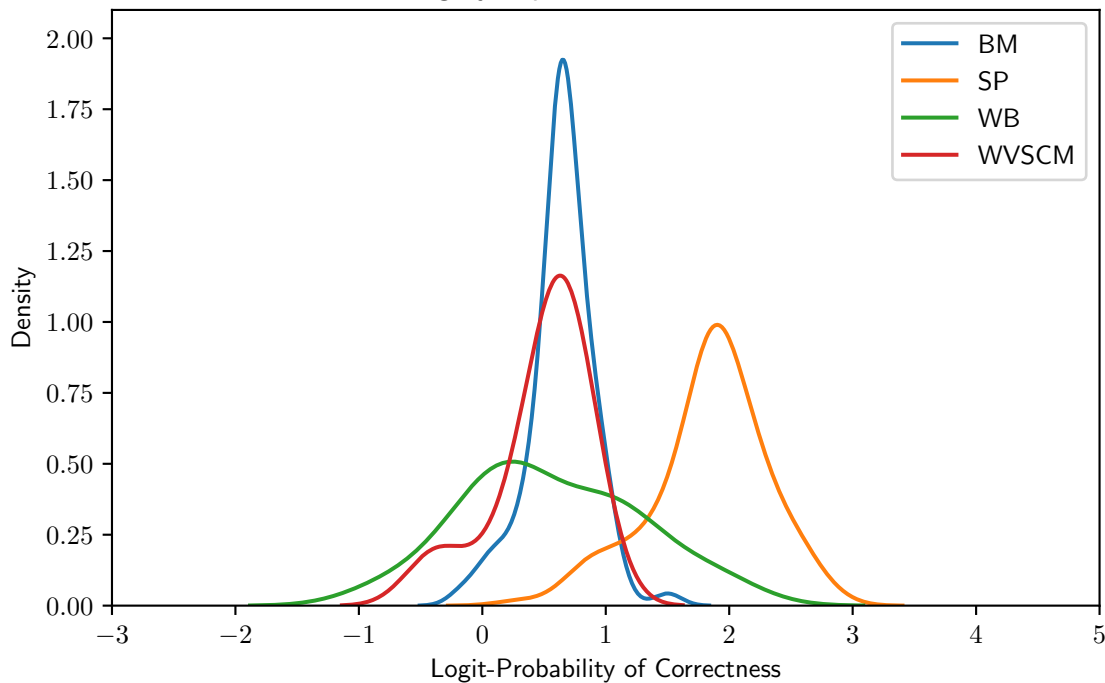

Supplement: supplementary_material [file attachment]
